# Supplementary material for: Spatially resolved analyses link genomic and immune diversity and reveal unfavorable neutrophil activation in melanoma
Source: PubMed Central journal article supplement (PMC7160105; doi:10.1038/s41467-020-15538-9), 2020-04-15
Supplement: 41467_2020_15538_MOESM3_ESM.pdf [file 41467_2020_15538_MOESM3_ESM.pdf]

## **Description of Additional Supplementary Files**

File Name: Supplementary Data 1

Description: Intra-tumoral heterogeneity sample analysis modalities by region.

File Name: Supplementary Data 2

Description: List of genes included on the targeted mutation panel.

File Name: Supplementary Data 3

Description: Somatic point-mutation events identified by targeted gene sequencing across multiple sub-regions of a melanoma tumor reveal significant intra-tumoral mutational heterogeneity.

File Name: Supplementary Data 4

Description: Differentially-expressed genes comparing chromosome 10 loss versus stable regions.

File Name: Supplementary Data 5

Description: Complete list of differentially-expressed genes confirming the activity of multiple immune subsets in regions of heavy immune infiltration.

File Name: Supplementary Data 6

Description: CIBERSORT-derived immune cell population frequencies within each sampled sub-region of the on-PD-1 inhibitor tumor.

File Name: Supplementary Data 7

Description: List of neutrophil marker genes used by immune deconvolution algorithms.

File Name: Supplementary Data 8

Description: Neutrophil-related Gene Ontology (GO) term sets.
